# Supplementary material
Source: PubMed Central journal article supplement (PMC2966059)

# Synthesis of Mito-Q

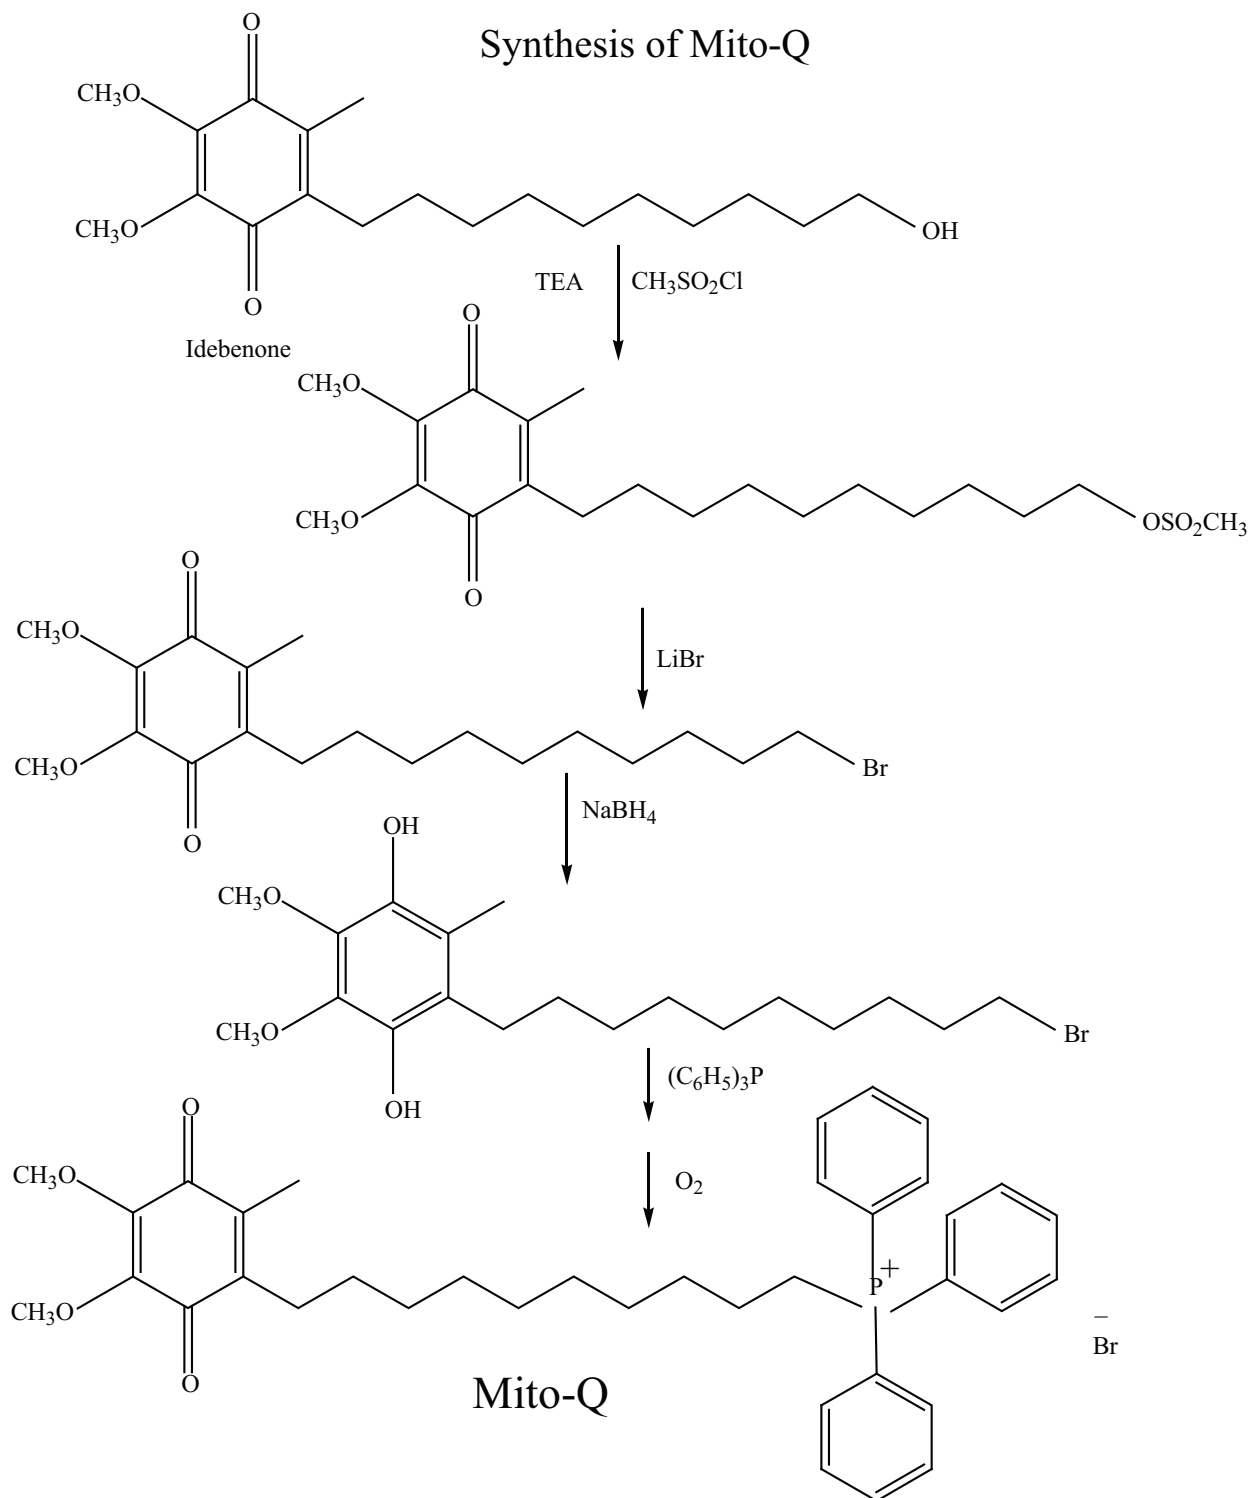

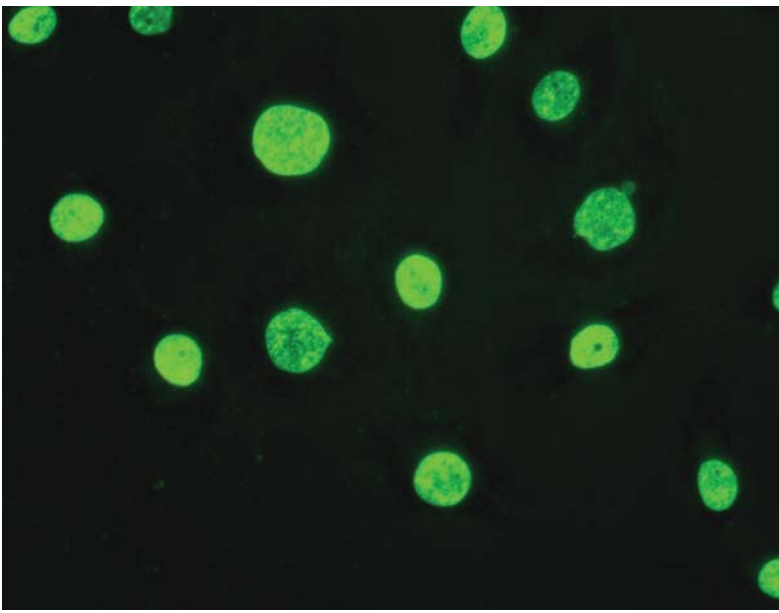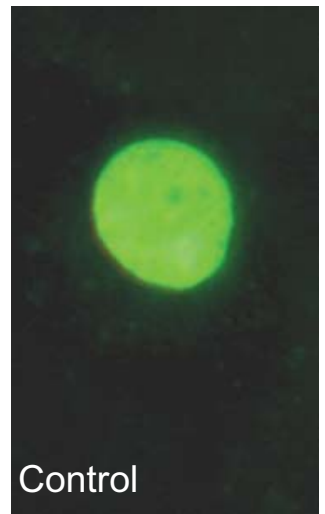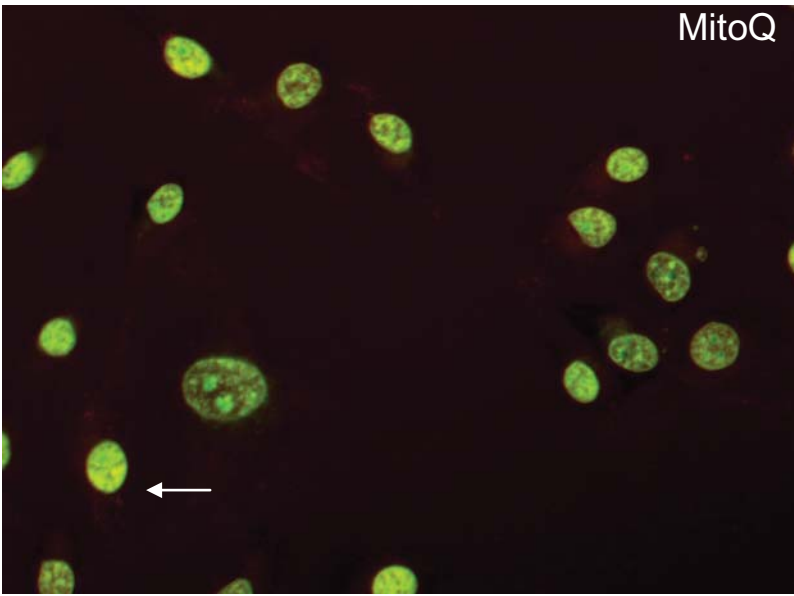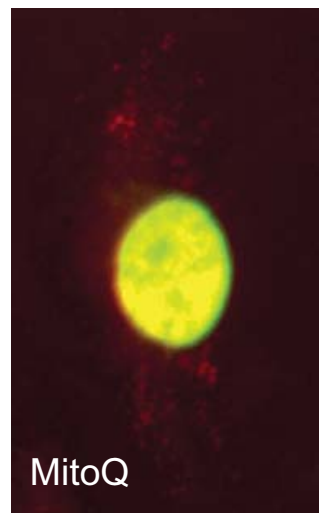

Supplementary Figure 2  
Rao et al

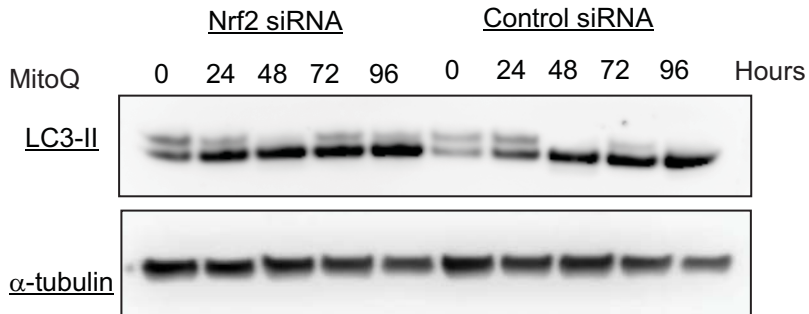

Supplementary Figure 3  
Rao et al

Supplement: supp_M110.133579_Rao_et_al_JBC_Suppl_figs_v3_FINAL.pdf [file supp_M110.133579_Rao_et_al_JBC_Suppl_figs_v3_FINAL.pdf]
